# Supplementary material for: Interrelationships Between Apoptosis and Fertility in Bull Sperm
Source: PubMed Central journal article supplement — J Reprod Dev. 2012 Sep 14;59(1):18–26. doi: 10.1262/jrd.2012-068 (PMC3943226; doi:10.1262/jrd.2012-068), 2012-09-14
Supplement: jrd-59-018-s001.pdf [file jrd-59-018-s001.pdf]

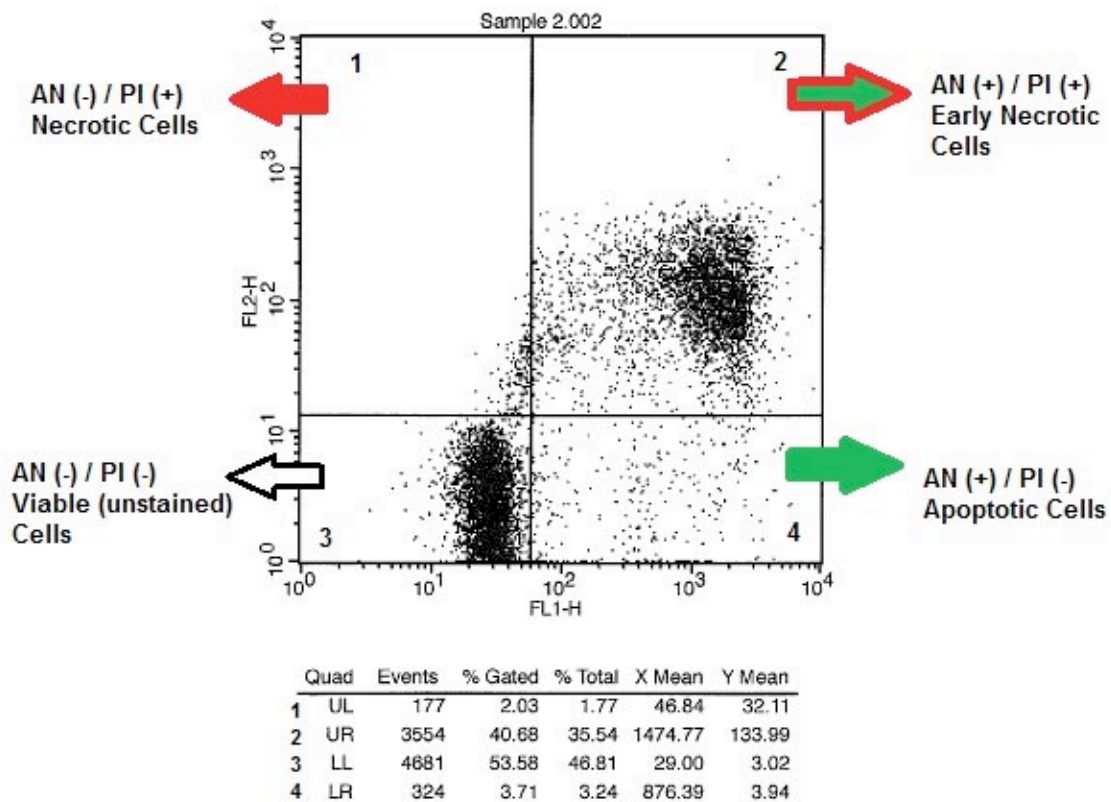

**Suppl Fig. 1.** Sperm cell population by flow cytometry. Four distinct populations can be identified with Annexin-V/PI assay. While late necrotic spermatozoa were stained with PI, but not with Annexin V (Suppl Fig. 1; UL), early necrotic spermatozoa were labeled with both Annexin V and PI (Suppl Fig. 1; UR). Viable spermatozoa were stained with neither Annexin V nor PI (Suppl Fig. 1; LL), while apoptotic spermatozoa were labeled with only Annexin V, but not with PI (Suppl Fig. 1; LR).
