# Supplementary material for: Interrelationships Between Apoptosis and Fertility in Bull Sperm
Source: PubMed Central journal article supplement — J Reprod Dev. 2012 Sep 14;59(1):18–26. doi: 10.1262/jrd.2012-068 (PMC3943226; doi:10.1262/jrd.2012-068), 2012-09-14
Supplement: jrd-59-018-s002.pdf [file jrd-59-018-s002.pdf]

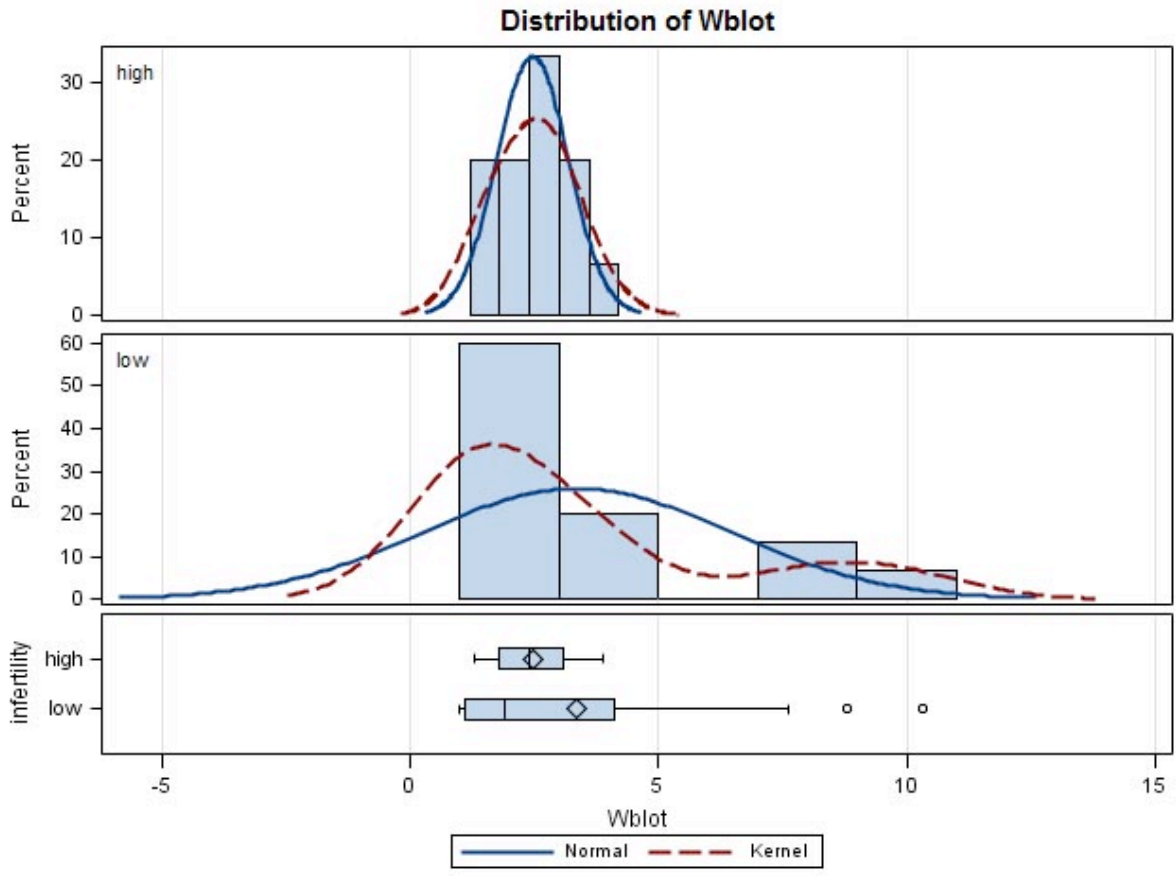

**Suppl Fig. 2.** The distribution graph of Western Blotting data. The distribution of western blotting data among the groups high vs. low fertility generated by SAS software is represented here. Each group contains five bulls and each bar in the graphs indicates a bull. The protein levels of each bull were calculated by the software (see material methods for details).
