# Supplementary material for: Interrelationships Between Apoptosis and Fertility in Bull Sperm
Source: PubMed Central journal article supplement — J Reprod Dev. 2012 Sep 14;59(1):18–26. doi: 10.1262/jrd.2012-068 (PMC3943226; doi:10.1262/jrd.2012-068), 2012-09-14
Supplement: jrd-59-018-s003.pdf [file jrd-59-018-s003.pdf]

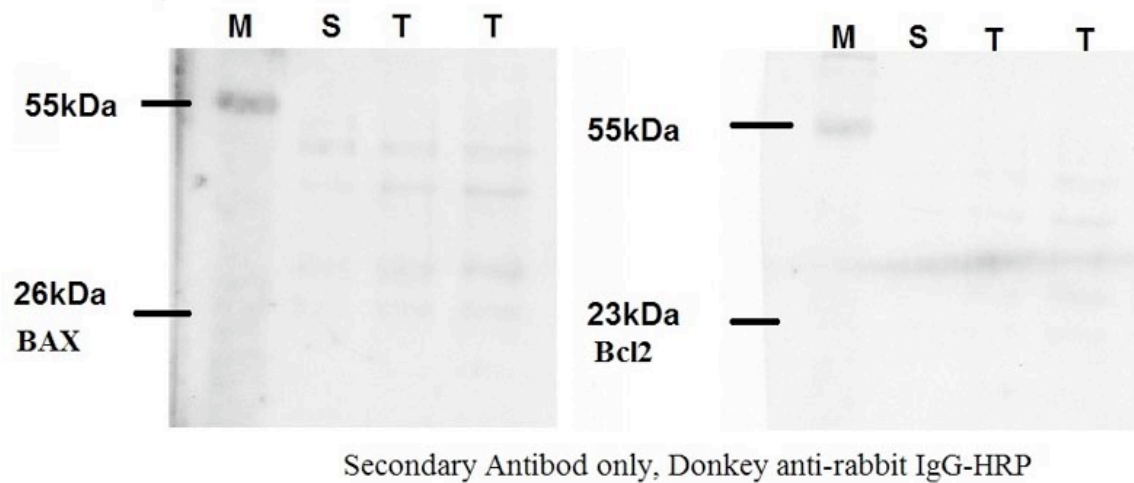

**Suppl Fig. 3.** Western Blotting negative controls. Secondary antibodies conjugated to horseradish peroxidase only (Donkey anti-rabbit IgG-HRP, sc-2313 for Bcl2 and BAX. M: Marker, T: Testis, S: Sperm
